# Supplementary material
Source: publisher site journal article supplement (https://www.dovepress.com/article/400545)
Supplement: Supplementary file 1 [file get_supplementary_file.php]

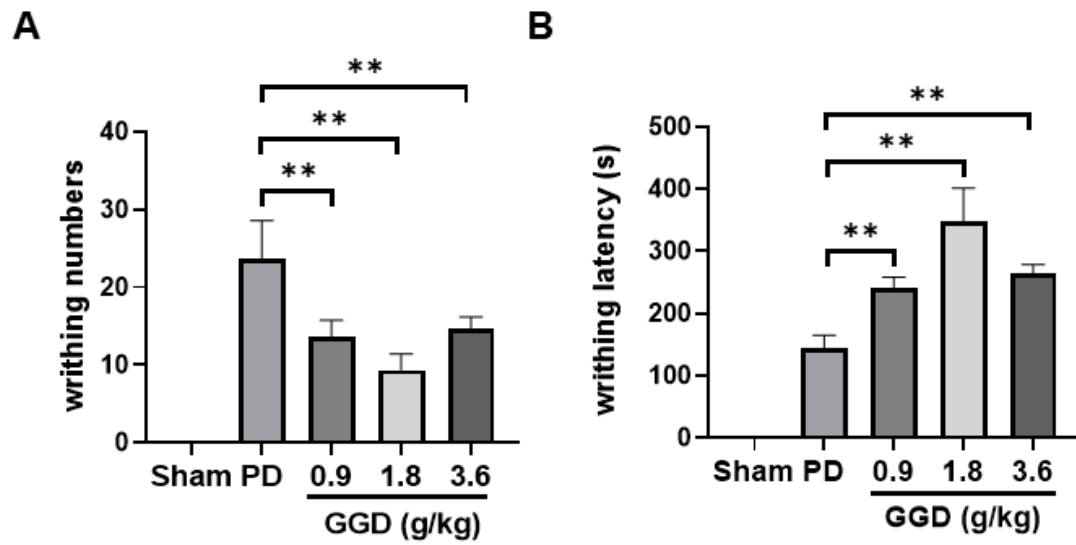

**Figure S1. Inhibitory effects of GGD on PD model rat.** The writhing numbers (A) and the writhing latency (B) of rats in control (sham) group, PD model group, low-concentration (0.9 g/kg) GGD group, medium-concentration (1.8 g/kg) GGD group, and high-concentration (3.6 g/kg) GGD group. Data are presented as the means  $\pm$  SD. \*\* $P < 0.01$ ,  $n = 6$ .
